# Supplementary material for: Multimodal pelvic floor rehabilitation in chronic stroke survivors: Long-term efficacy, optimal protocols, and adjunctive therapies for comprehensive pelvic floor dysfunction: A multicenter randomized controlled trial
Source: Research Square preprint supplement (doi:10.21203/rs.3.rs-8765470/v1), 2026-02-05
Supplement: Supplementary file 1 [file 702f71bc9b7c1f4b7f4c462d.pdf]

## CONSORT 2010 checklist

"Multimodal Pelvic Floor Rehabilitation in Chronic Stroke Survivors: Long-Term Efficacy, Optimal Protocols, and Adjunctive Therapies for Comprehensive Pelvic Floor Dysfunction – A Multicenter Randomized Controlled Trial").

The table follows the standard **CONSORT 2010** 25-item structure (for parallel-group RCTs). The paper is a four-arm parallel-group multicenter RCT, so the standard checklist applies (with multi-arm aspects implicitly covered under relevant items).

For each item:

- **Item description** (verbatim or close paraphrase from CONSORT 2010)
- **Reported in paper?** → Yes / Partially / No
- **Location / Evidence** → Brief reference to section(s), table(s), figure(s), or explanation

| Section / Topic           | Item No | Checklist Item                                                        | Reported? | Location / Evidence in the Paper                                                                       |
|---------------------------|---------|-----------------------------------------------------------------------|-----------|--------------------------------------------------------------------------------------------------------|
| <b>Title and Abstract</b> | 1a      | Identification as a randomised trial in the title                     | Yes       | Title explicitly states "A Multicenter Randomized Controlled Trial"                                    |
|                           | 1b      | Structured summary of trial design, methods, results, and conclusions | Yes       | Abstract is structured (Background, Objective, Methods, Results, Conclusion) with key elements covered |
| <b>Introduction</b>       |         |                                                                       |           |                                                                                                        |
| Background and objectives | 2a      | Scientific background and explanation of rationale                    | Yes       | Introduction section details stroke prevalence, PFD impact, evidence gaps, prior reviews               |
|                           | 2b      | Specific objectives or hypotheses                                     | Yes       | Explicit hypotheses listed (e.g., ≥80% sustain gains, domain-specific benefits, predictors)            |
| <b>Methods</b>            |         |                                                                       |           |                                                                                                        |

| Section / Topic | Item No | Checklist Item                                                                                                                        | Reported?           | Location / Evidence in the Paper                                                                                                        |
|-----------------|---------|---------------------------------------------------------------------------------------------------------------------------------------|---------------------|-----------------------------------------------------------------------------------------------------------------------------------------|
| Trial design    | 3a      | Description of trial design (such as parallel, factorial) including allocation ratio                                                  | Yes                 | Section 2.1: prospective, assessor-blinded, four-arm parallel-group RCT; 1:1:1:1 ratio                                                  |
|                 | 3b      | Important changes to methods after trial commencement (e.g., eligibility criteria), with reasons                                      | Yes (none reported) | No changes mentioned; implies none occurred                                                                                             |
| Participants    | 4a      | Eligibility criteria for participants                                                                                                 | Yes                 | Section 2.2: detailed inclusion/exclusion criteria                                                                                      |
|                 | 4b      | Settings and locations where the data were collected                                                                                  | Yes                 | Section 2.1: eight rehabilitation centers in Scandinavia, Russia, and Pakistan (specific hospitals named)                               |
| Interventions   | 5       | The interventions for each group with sufficient details to allow replication, including how and when they were actually administered | Yes                 | Section 2.4: detailed protocols for each of 4 groups (PFMT variations, adjuncts, frequency, duration, home phase)                       |
| Outcomes        | 6a      | Completely defined pre-specified primary and secondary outcome measures, including how and when they were assessed                    | Yes                 | Section 2.5: primaries (Oxford scale, perineometry, ICIQ-UI SF, Wexner); secondaries (FSFI/IEEF-5, SF-36, SIS, etc.); timepoints listed |
|                 | 6b      | Any changes to trial outcomes after the trial commenced, with reasons                                                                 | Yes (none reported) | No changes mentioned                                                                                                                    |
| Sample size     | 7a      | How sample size was determined                                                                                                        | Yes                 | Section 2.2: power calculation (1.2-point difference, SD 1.8, 90% power, 20% attrition) → n=105/group                                   |
|                 | 7b      | When applicable, explanation of any interim analyses and stopping guidelines                                                          | N/A                 | No interim analyses or stopping rules mentioned                                                                                         |

| Section / Topic                                    | Item No | Checklist Item                                                                                                                                                                              | Reported? | Location / Evidence in the Paper                                                                                      |
|----------------------------------------------------|---------|---------------------------------------------------------------------------------------------------------------------------------------------------------------------------------------------|-----------|-----------------------------------------------------------------------------------------------------------------------|
| Randomisation:<br>Sequence generation              | 8a      | Method used to generate the random allocation sequence                                                                                                                                      | Yes       | Section 2.3: computer-based random number generator, permuted blocks of size 4                                        |
| Randomisation:<br>Allocation concealment mechanism | 9       | Mechanism used to implement the random allocation sequence (such as sequentially numbered containers), describing any steps taken to conceal the sequence until interventions were assigned | Yes       | Section 2.3: sequentially numbered, opaque, sealed envelopes; prepared by independent statistician                    |
| Randomisation:<br>Implementation                   | 10      | Who generated the random allocation sequence, who enrolled participants, and who assigned participants to interventions                                                                     | Yes       | Section 2.3: independent statistician generated sequence; site coordinators enrolled; site PI assigned via envelope   |
| Blinding                                           | 11a     | If done, who was blinded after study enrolment (e.g., participants, care providers, those assessing outcomes) and how                                                                       | Yes       | Section 2.3: assessor-blinded and statistician-blinded; participants/therapists not blinded (nature of interventions) |
|                                                    | 11b     | If relevant, description of the similarity of interventions                                                                                                                                 | Partially | Interventions differ by design (adjuncts, frequency); similarity not applicable/relevant                              |
| Statistical methods                                | 12a     | Statistical methods used to compare groups for primary and secondary outcomes                                                                                                               | Yes       | Section 2.6: linear mixed models, ITT, restricted maximum likelihood, R 4.4.1                                         |
|                                                    | 12b     | Methods for additional analyses, such as subgroup analyses and adjusted analyses                                                                                                            | Yes       | Multivariable regression for predictors; multiple imputation for missing data (<12%)                                  |
| <b>Results</b>                                     |         |                                                                                                                                                                                             |           |                                                                                                                       |
| Participant flow<br>(diagram recommended)          | 13a     | For each group, the numbers of participants who were randomly assigned, received intended treatment, and were analysed for the primary outcome                                              | Partially | No explicit CONSORT flow diagram; numbers implied (n=420 total, 105/group); ITT n=420; missing data <12%              |

| Section / Topic         | Item No | Checklist Item                                                                                                                                  | Reported? | Location / Evidence in the Paper                                                                                                         |
|-------------------------|---------|-------------------------------------------------------------------------------------------------------------------------------------------------|-----------|------------------------------------------------------------------------------------------------------------------------------------------|
|                         | 13b     | For each group, losses and exclusions after randomisation, together with reasons                                                                | Partially | Attrition implied (<12% missing); no detailed losses/exclusions per group or reasons                                                     |
| Recruitment             | 14a     | Dates defining the periods of recruitment and follow-up                                                                                         | Yes       | Section 2.1: January 2022 to June 2025 (enrollment and follow-up period)                                                                 |
|                         | 14b     | Why the trial ended or was stopped                                                                                                              | Yes (N/A) | Completed as planned; no early stopping                                                                                                  |
| Baseline data           | 15      | A table showing baseline demographic and clinical characteristics for each group                                                                | Yes       | Table 1: detailed baseline characteristics by group (age, sex, stroke type, time since stroke, outcome scores); balanced (all $p>0.05$ ) |
| Numbers analysed        | 16      | For each group, number of participants (denominator) included in each analysis and whether the analysis was by original assigned groups         | Yes       | Intention-to-treat; n=105 per group; analyses report adjusted means/changes                                                              |
| Outcomes and estimation | 17a     | For each primary and secondary outcome, results for each group, and the estimated effect size and its precision (e.g., 95% confidence interval) | Yes       | Tables 2–5, Figures 1–6: mean changes, 95% CIs (where given), p-values (e.g., Wexner $p=0.002$ )                                         |
|                         | 17b     | For binary outcomes, presentation of both absolute and relative effect sizes is recommended                                                     | N/A       | Mostly continuous outcomes; remission rates given (e.g., Table 3: 51% vs 30%)                                                            |
| Ancillary analyses      | 18      | Results of any other analyses performed, including subgroup analyses and adjusted analyses, distinguishing pre-specified from exploratory       | Yes       | Predictors (multivariable ORs with 95% CIs, Figure 6); correlations (heatmap, Figure 5)                                                  |
| Harms                   | 19      | All important harms or unintended effects in each group (for specific guidance see CONSORT for harms)                                           | No        | No adverse events or harms reported (likely none occurred, but not explicitly stated)                                                    |

| Section / Topic          | Item No | Checklist Item                                                                                                   | Reported? | Location / Evidence in the Paper                                                                                             |
|--------------------------|---------|------------------------------------------------------------------------------------------------------------------|-----------|------------------------------------------------------------------------------------------------------------------------------|
| <b>Discussion</b>        |         |                                                                                                                  |           |                                                                                                                              |
| Limitations              | 20      | Trial limitations, addressing sources of potential bias, imprecision, and, if relevant, multiplicity of analyses | Yes       | Section 4 (Limitations): optimism bias in adherence, limited ethnic diversity, need for cost-effectiveness/digital platforms |
| Generalisability         | 21      | Generalisability (external validity) of the trial findings                                                       | Yes       | Discussion notes multicenter design enhances validity but calls for broader ethnic/socioeconomic groups                      |
| Interpretation           | 22      | Interpretation consistent with results, balancing benefits and harms, and considering other relevant evidence    | Yes       | Conclusion and Discussion integrate results with prior evidence, emphasize clinical implications                             |
| <b>Other information</b> |         |                                                                                                                  |           |                                                                                                                              |
| Registration             | 23      | Registration number and name of trial registry                                                                   | Yes       | Section 2.1 & Declarations: prospectively registered on OSF (osf.io/xyxyx)                                                   |
| Protocol                 | 24      | Where the full trial protocol can be accessed, if available                                                      | Partially | Implied via OSF registration; no direct link to full protocol                                                                |
| Funding                  | 25      | Sources of funding and other support (such as supply of drugs), role of funders                                  | Yes       | Declarations: no external funding; institutional resources only; funding did not compromise findings                         |
